# Supplementary material for: Plant Extracts and Phytochemicals from the Asteraceae Family with Antiviral Properties
Source: MDPI journal article supplement (doi:10.3390/molecules29040814), 2024-02-09
Supplement: s1 [file s1]

# Supplementary Material

Article

## Plant extracts and phytochemicals from the Asteraceae family with antiviral properties

Jimena Borgo<sup>1,2,†</sup>, Mariel S. Wagner<sup>3,†</sup>, Laura C. Laurella<sup>1,2</sup>, Orlando G. Elso<sup>2,4</sup>, Mariana G. Selener<sup>2</sup>, María Clavin<sup>2</sup>, Hernán Bach<sup>5</sup>, César A.N. Catalán<sup>6</sup>, Augusto E. Bivona<sup>7,8</sup>, Claudia S. Sepúlveda<sup>9,‡,\*</sup>, Valeria P. Sülsen<sup>1,2,‡,\*</sup>

<sup>1</sup> Instituto de Química y Metabolismo del Fármaco (IQUIMEFA), CONICET-Universidad de Buenos Aires, Junín 956, piso 2, Buenos Aires C1113AAD, Argentina

<sup>2</sup> Facultad de Farmacia y Bioquímica, Universidad de Buenos Aires, Junín 956, piso 2, Buenos Aires C1113AAD, Argentina

<sup>3</sup> Laboratorio de Estrategias Antivirales, Departamento de Química Biológica, Facultad de Ciencias Exactas y Naturales, Universidad de Buenos Aires, Int. Güiraldes 2160, piso 4, Buenos Aires C1428EGA, Argentina.

<sup>4</sup> Unidad de Microanálisis y Métodos Físicos Aplicados a Química Orgánica (UMYMFOR), Facultad de Ciencias Exactas y Naturales, CONICET-Universidad de Buenos Aires, Ciudad Universitaria, Pabellón 2, piso 3, Buenos Aires C1428EGA, Argentina

<sup>5</sup> Instituto Nacional de Tecnología Agropecuaria (INTA) Gobernador Guillermo Udaondo 1695 Estación Experimental Agropecuaria Área Metropolitana de Buenos Aires, EEA AMBA Udaondo Buenos Aires, B1713 AAW, Argentina

<sup>6</sup> Universidad Nacional de Tucumán, Facultad de Bioquímica, Química y Farmacia, Instituto de Química Orgánica, Ayacucho 471, (T4000INI), San Miguel de Tucumán, Tucumán, Argentina

<sup>7</sup> Instituto de Estudios de la Inmunidad Humoral Prof. Ricardo A. Margni (IDEHU), CONICET-Universidad de Buenos Aires, Junín 956, piso 4, Buenos Aires C1113AAD, Argentina

<sup>8</sup> Instituto de Investigaciones en Microbiología y Parasitología Médica (IMPaM), CONICET-Universidad de Buenos Aires, Paraguay 2155, piso 13, Buenos Aires C1121ABG, Argentina

<sup>9</sup> Instituto de Química Biológica de la Facultad de Ciencias Exactas y Naturales (IQUIBICEN) CONICET-Universidad de Buenos Aires, Int. Güiraldes 2160, piso 4, Buenos Aires C1428EGA, Argentina.

<sup>†</sup> These authors contributed equally to this work.

<sup>‡</sup> The work was co-directed by both authors.

\* Correspondence: vsulsen@ffyba.uba.ar; Tel.: +54 (011) 5287-4272 and claudia@qb.fcen.uba.ar

### 1. Chemical structure and spectral data of mikanolide (compound 1)

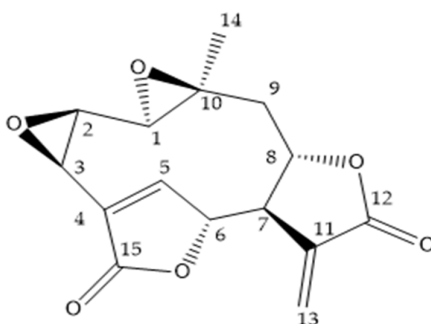

Figure S1. Chemical structure of mikanolide

UV ( $\lambda$  máx, nm) MeOH: 207 nm, IR (KBr),  $\gamma$  máx (cm<sup>-1</sup>): 1764 (C=O), 1640 (C=C)

MS (70 eV) m/z (int. rel.): 261 [M-1-CO<sup>+</sup>](2.8%), 243 [M-1-CO-H<sub>2</sub>O<sup>+</sup>](4.3%), 215 [M-1-CO-H<sub>2</sub>O-CO<sup>+</sup>](4.9%), 229 [M-H<sub>2</sub>O-Me-CO<sup>+</sup>](1.2%), 190 (3.1%), 165 (3.9%), 147 (2.9%), 125 (7.8%), 111 (29.1%), 97 (30.5%), 95 (100%), 91 (41.3%), 77 (40.3%), 55 (41.3%), 43 (58.9%).

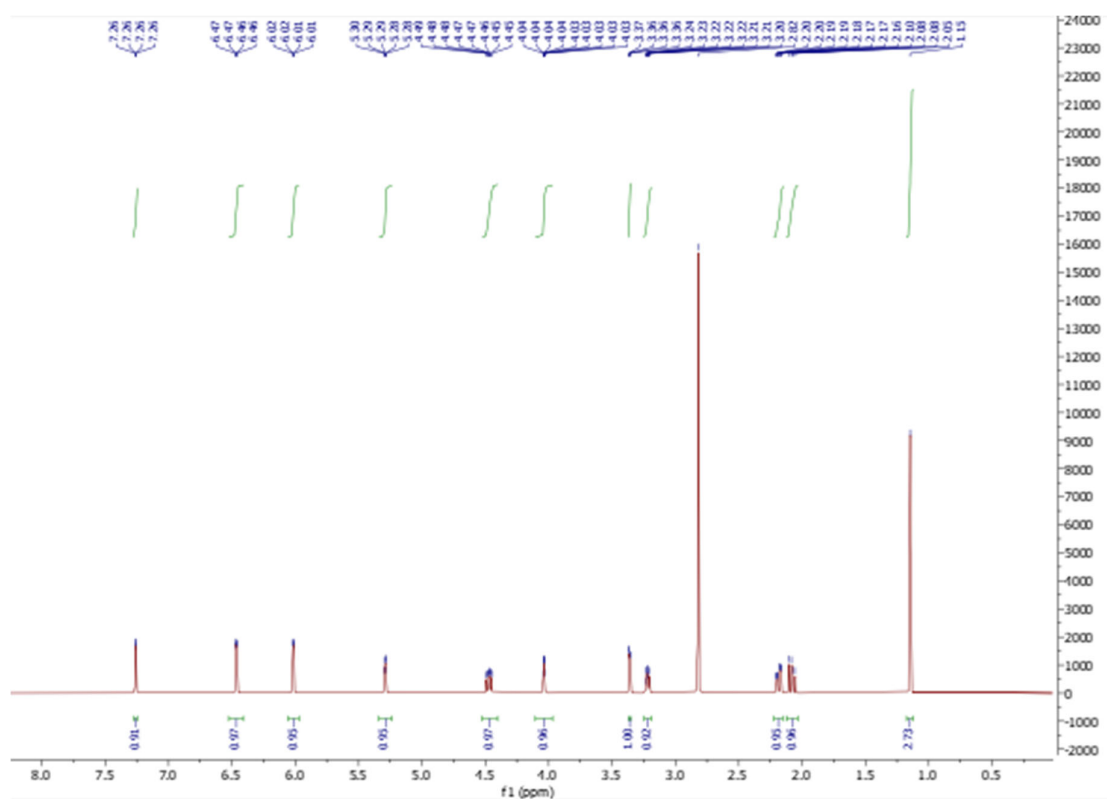

Figure S2. <sup>1</sup>H-NMR spectrum of mikanolide

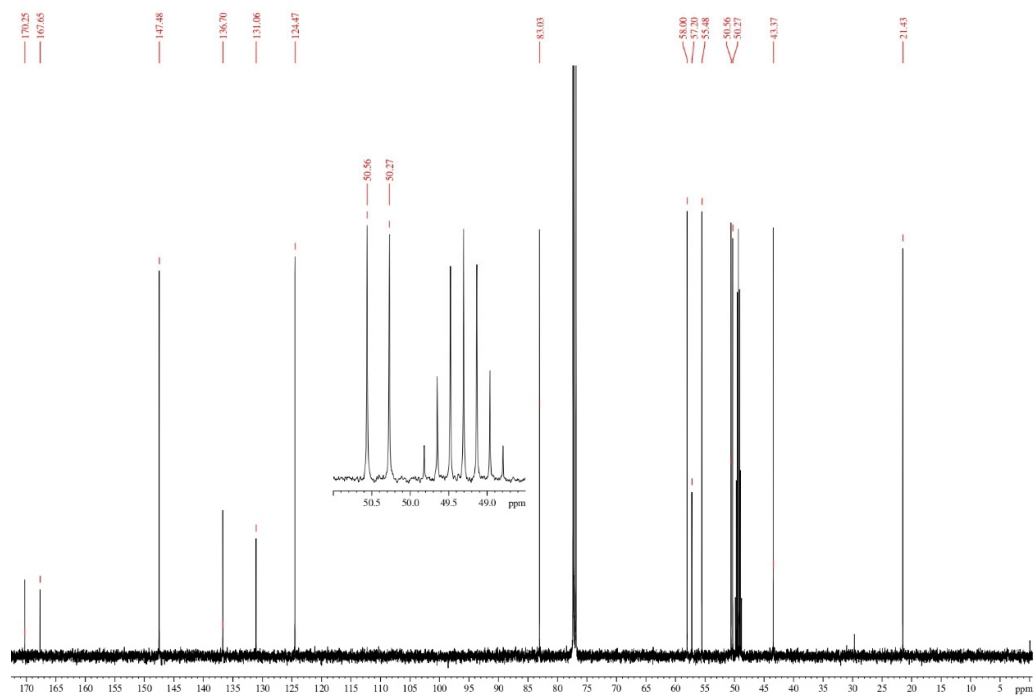

Figure S3.  $^{13}\text{C}$ -NMR spectrum of mikanolide

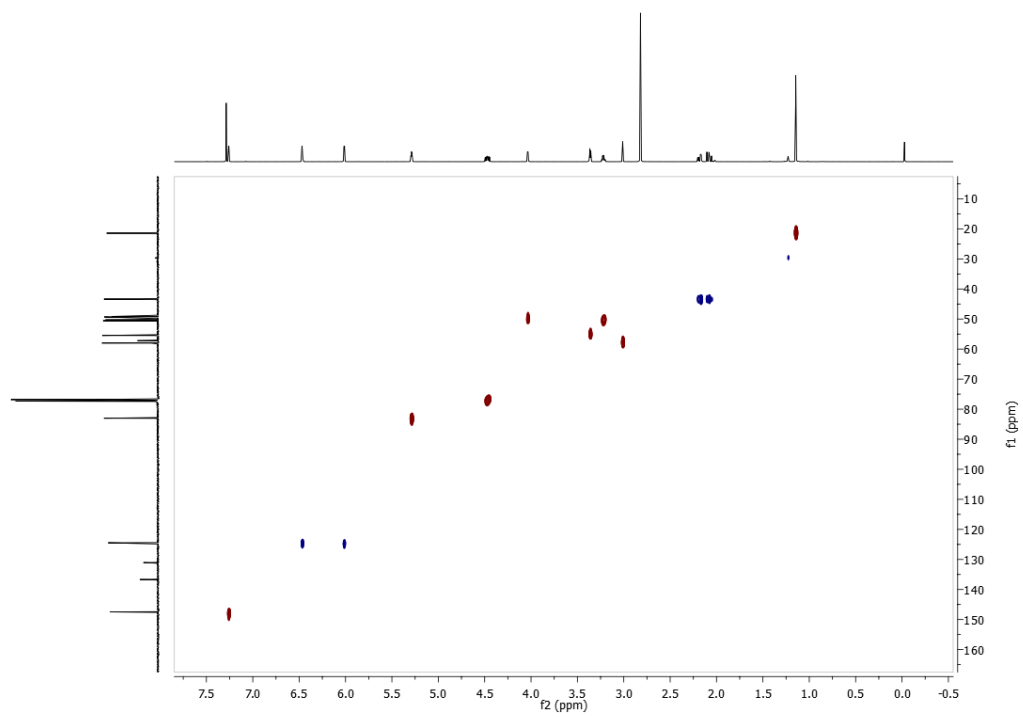

Figure S4. HSQC spectrum of mikanolide

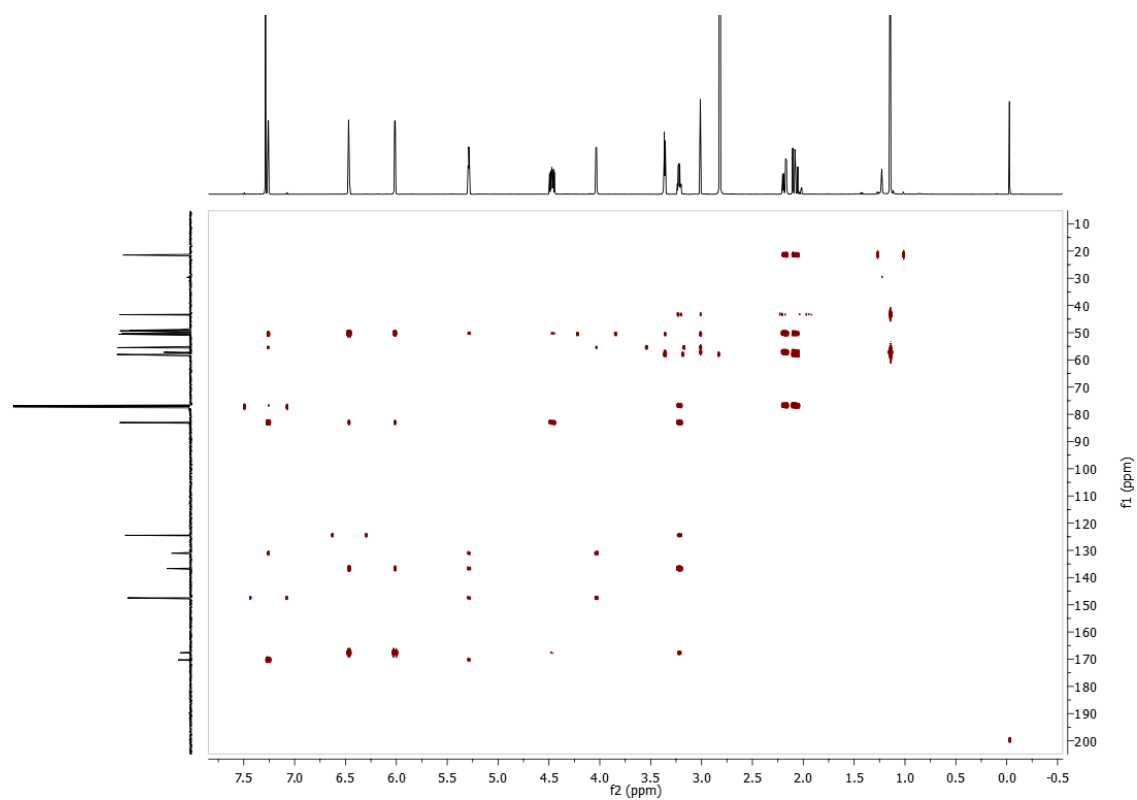

Figure S5. HMBC spectrum of mikanolide

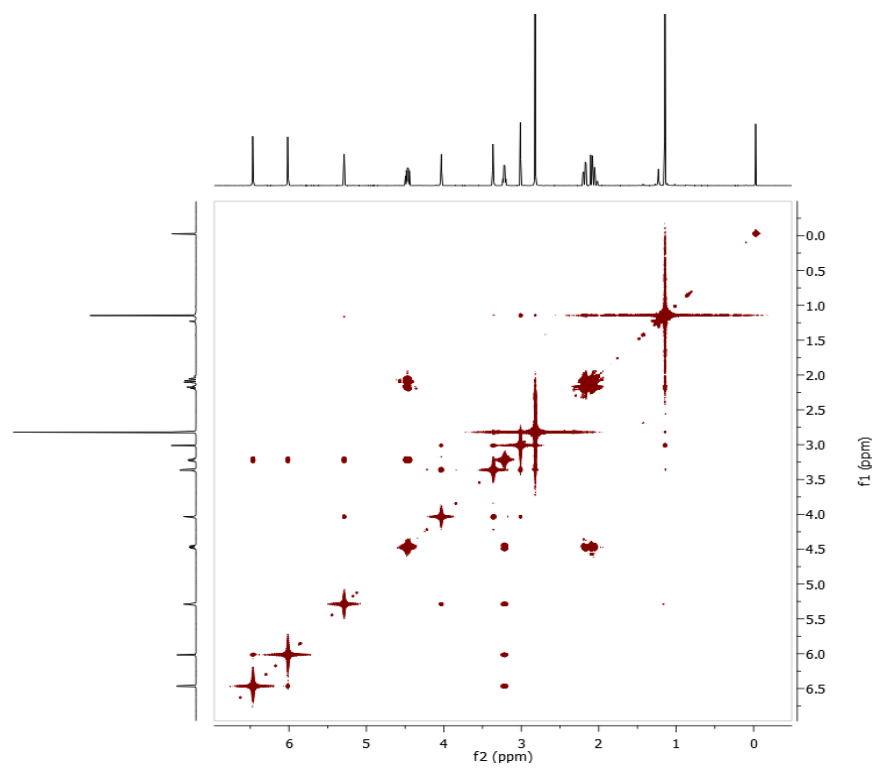

Figure S6.  $^1\text{H}$ - $^1\text{H}$  COSY spectrum of mikanolide

## 2. Chemical structure and spectral data of eupatoriopicrin (compound 2)

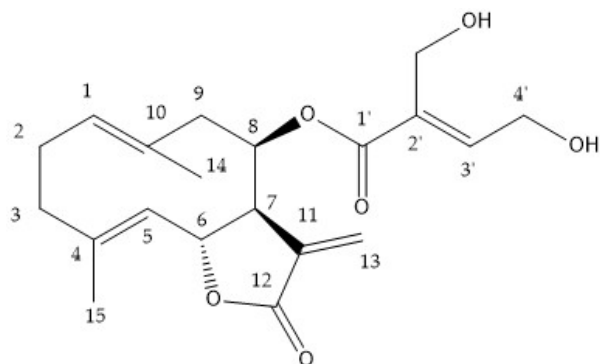

Figure S7. Chemical structure of eupatoriopicrin

IR (ATR),  $\gamma_{\text{máx}}$  ( $\text{cm}^{-1}$ ): 1738, 1714 ( $\text{C}=\text{O}$ ), 1660 ( $\text{C}=\text{C}$ ), 3419 ( $-\text{OH}$ ).

MS (70 eV)  $m/z$  (int. rel.): 363 [ $\text{M}+\text{H}^+$ ] (0.4%), 362 [ $\text{M}^+$ ], 231 (11.72%), 216 (3.9%), 176 (9.54%), 131 (13.77%), 113 (4.04%), 119 (40.89%), 105 (27.25%), 97 (52.27%), 95 (100%), 91 (35.3%), 69 (56.88%), 55 (37.74%), 43 (51.56%), 41 (55.06%).

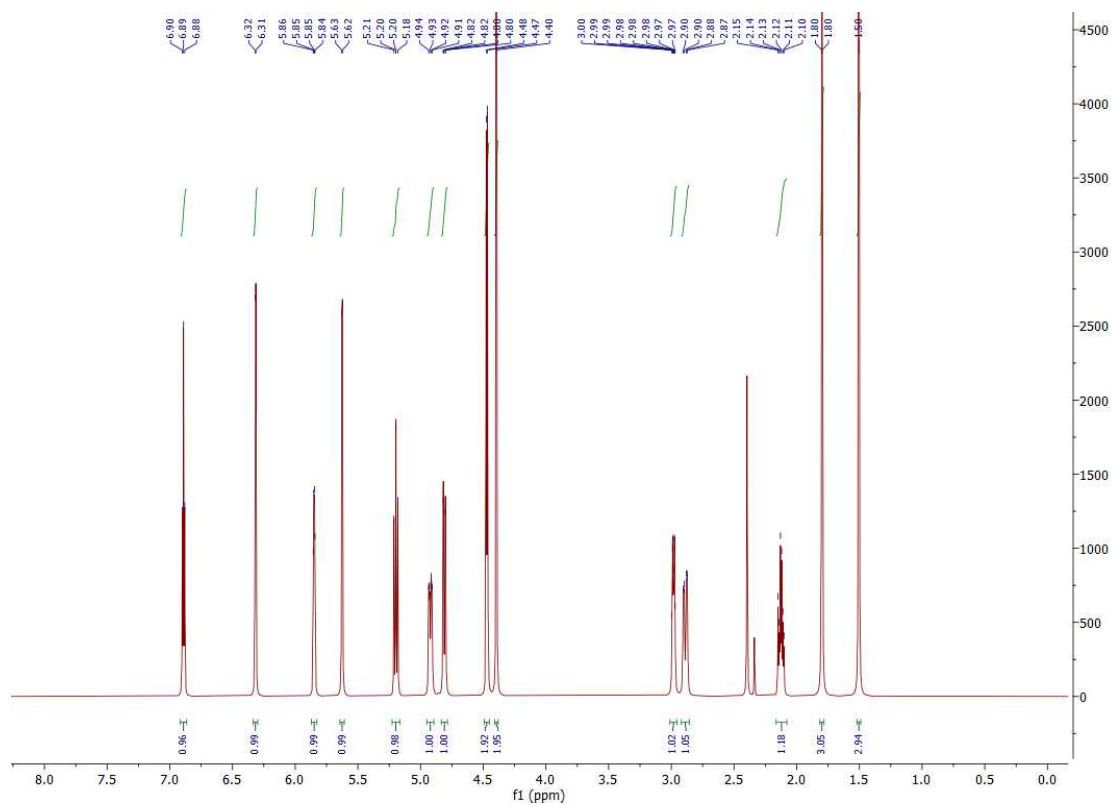

Figure S8.  $^1\text{H}$ -NMR spectrum of eupatoriopicrin

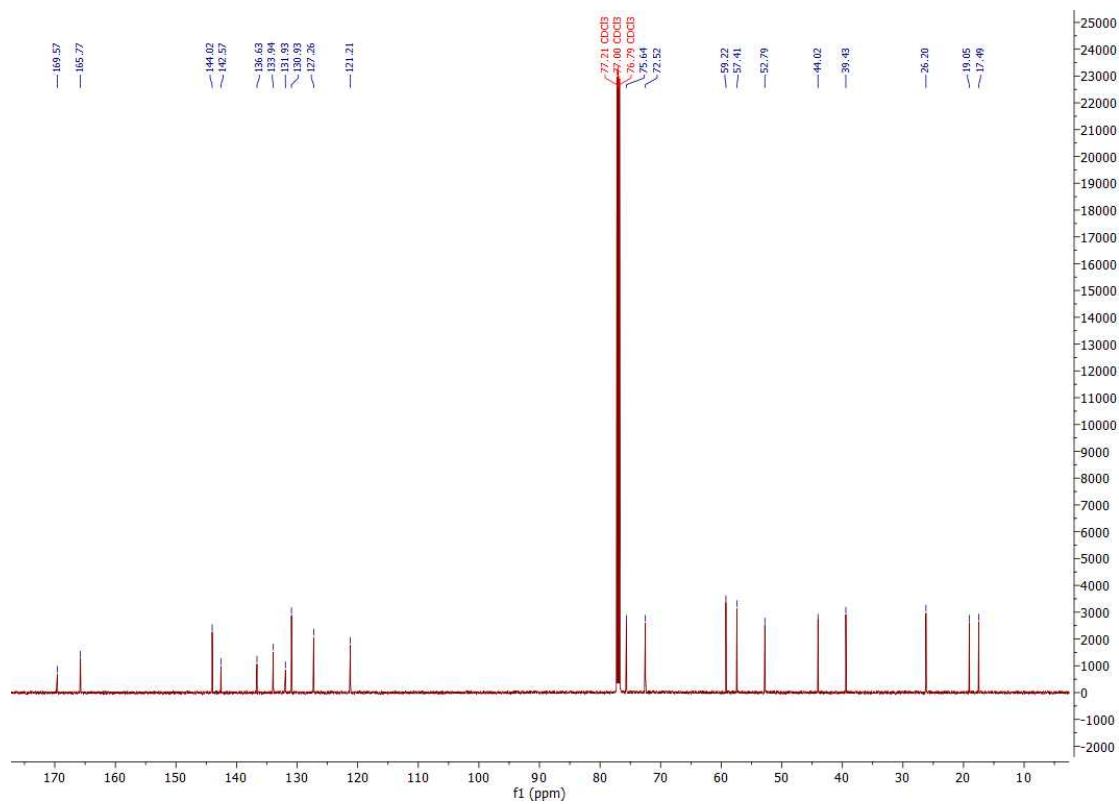

Figure S9.  $^{13}\text{C}$ -NMR spectrum of eupatoriopicrin

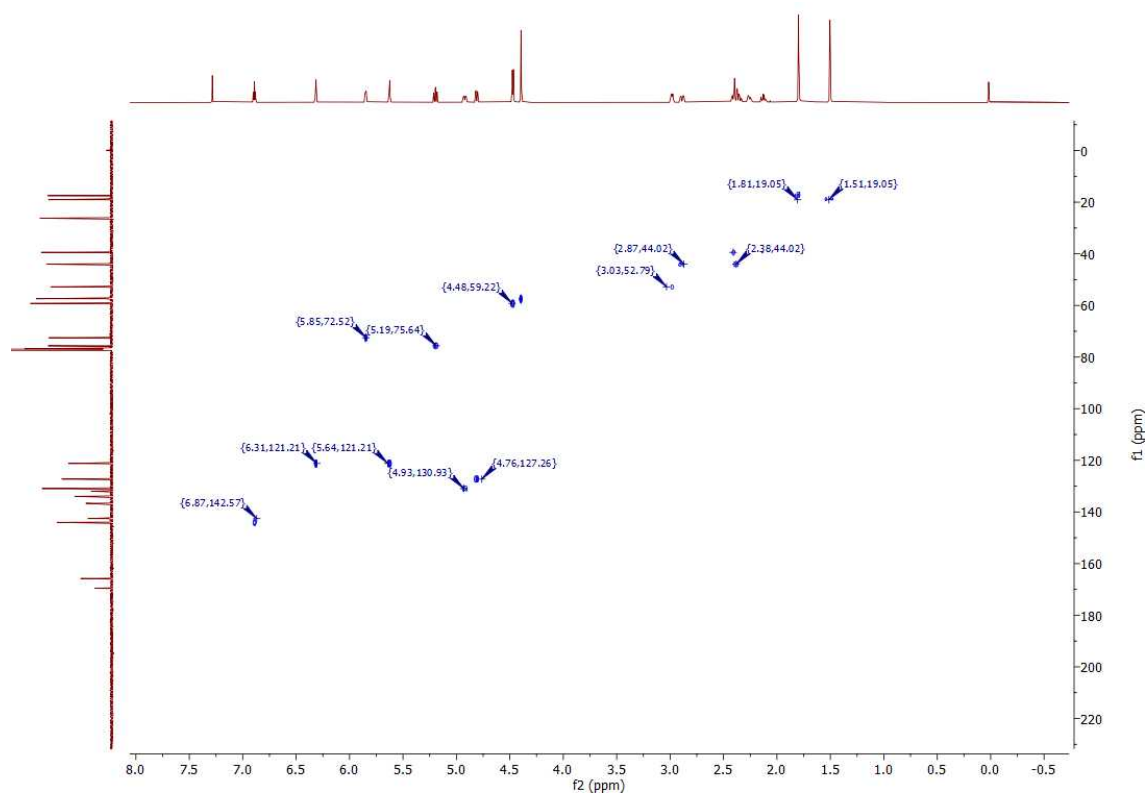

Figure S10. HSQC spectrum of eupatoriopicrin

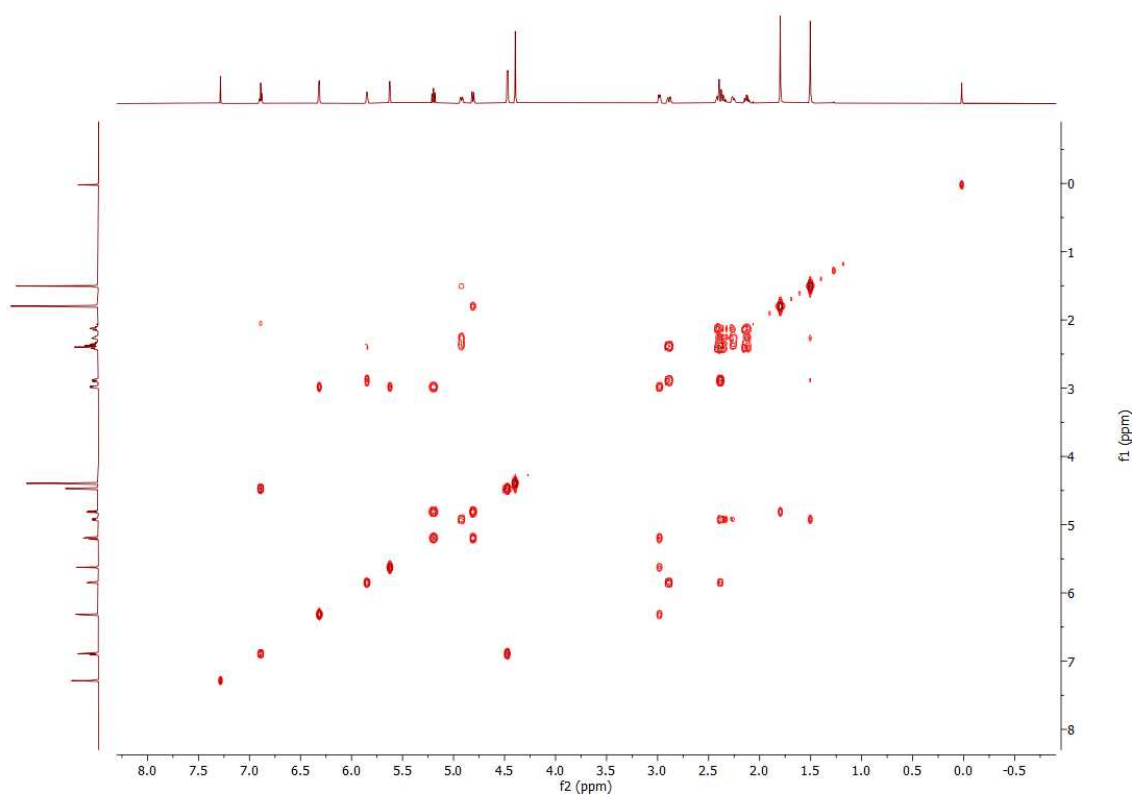

Figure S11.  $^1\text{H}$ - $^1\text{H}$  COSY spectrum of eupatoriopicrin

### 3. Chemical structure and spectral data of eupahakonenin B (compound 3)

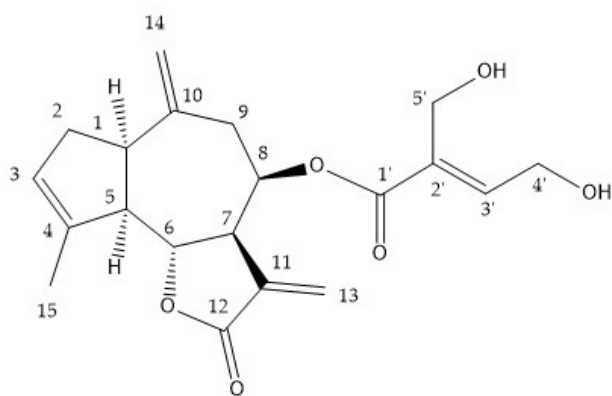

Figure S12. Chemical structure of eupahakonenin B

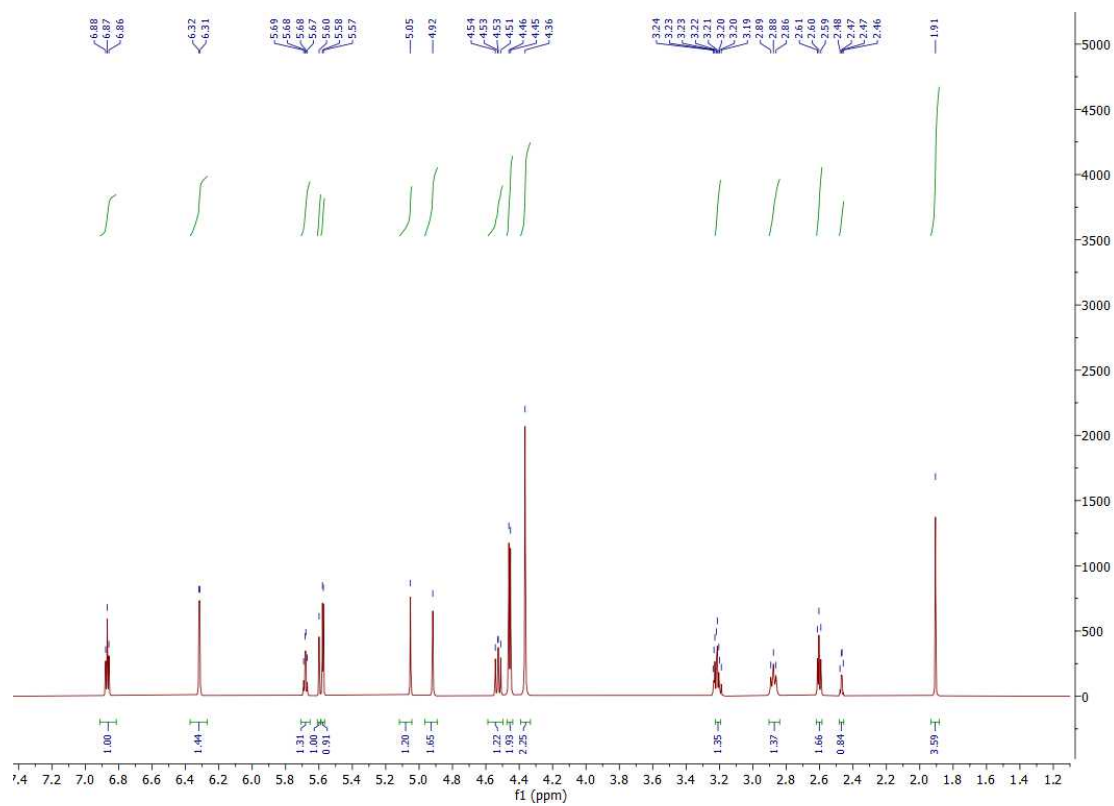

Figure S13. <sup>1</sup>H-NMR spectrum of eupahakonenin B

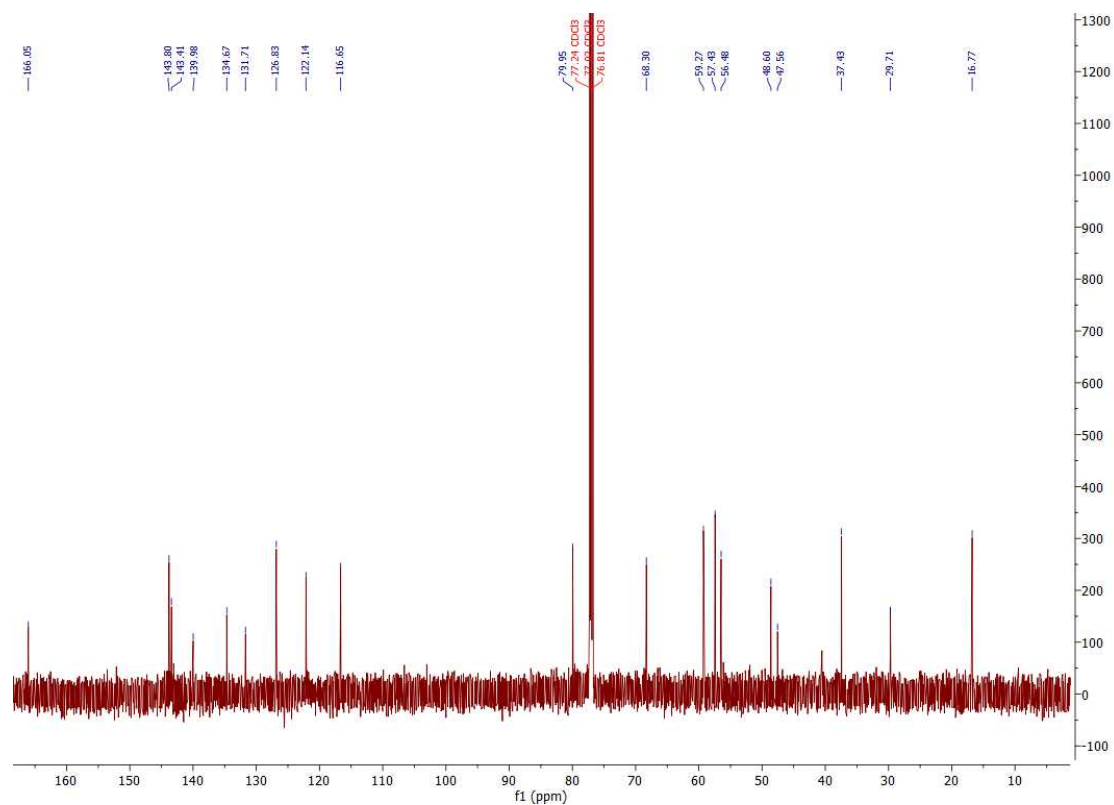

Figure S14. <sup>13</sup>C-NMR spectrum of eupahakonenin B



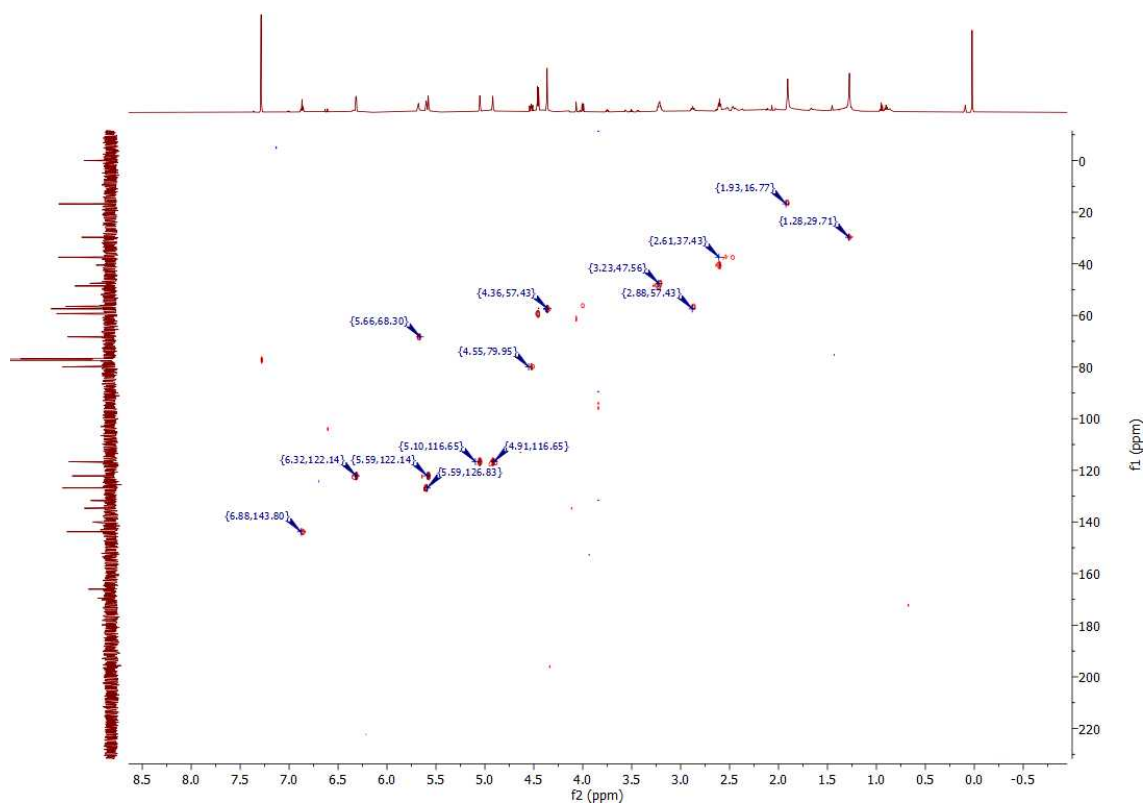

Figure S15. HSQC spectrum of eupahakonenin B

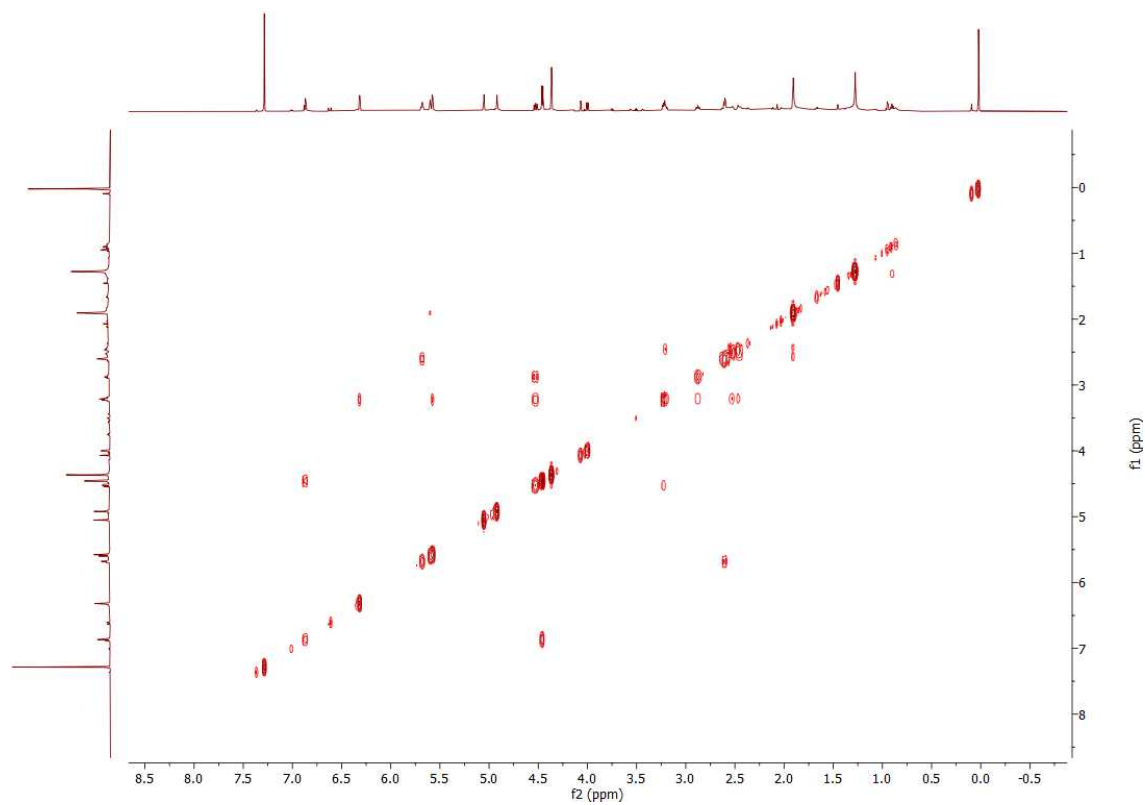

Figure S16.  $^1\text{H}$ - $^1\text{H}$  COSY spectrum of eupahakonenin B

#### 4. Chemical structure and spectral data of 2-oxo-8-deoxyligustrin (compound 6)

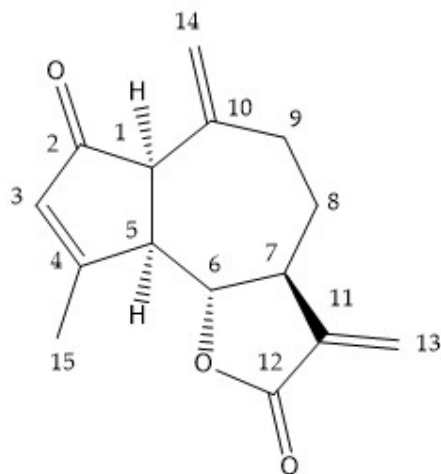

Figure S17. Chemical structure of 2-oxo-8-deoxyligustrin

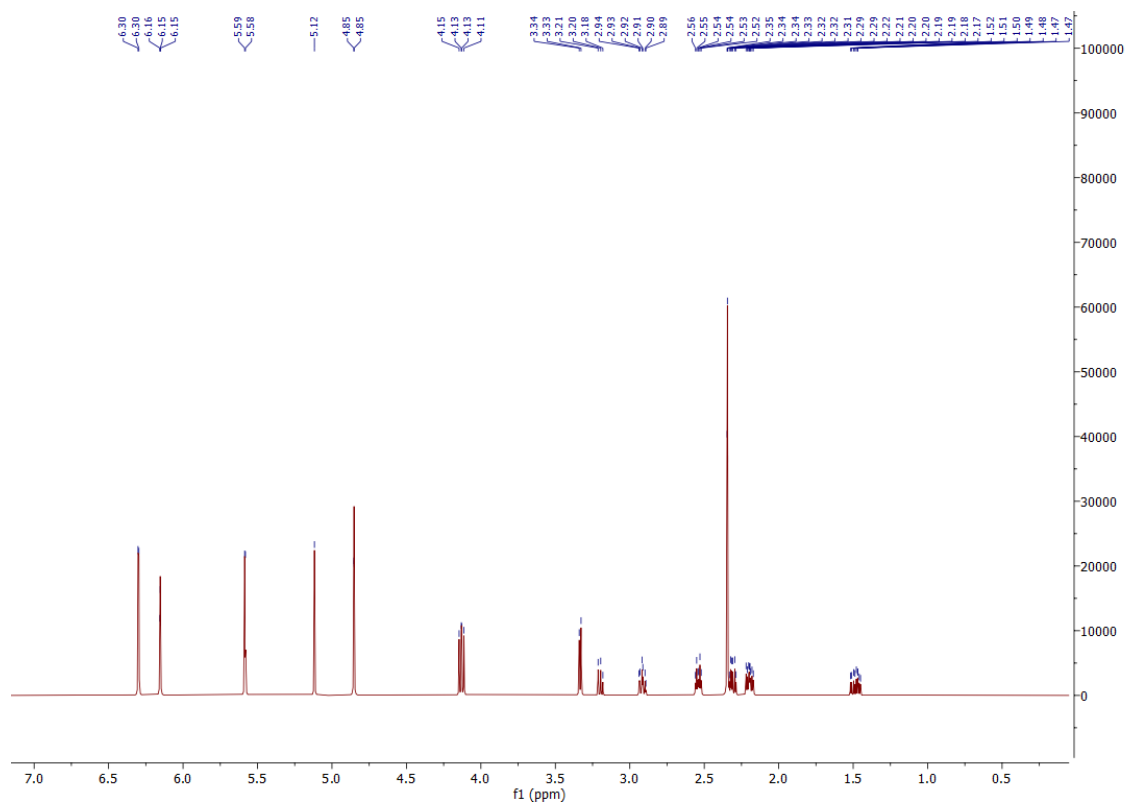

Figure S18. <sup>1</sup>H-NMR spectrum of 2-oxo-8-deoxyligustrin

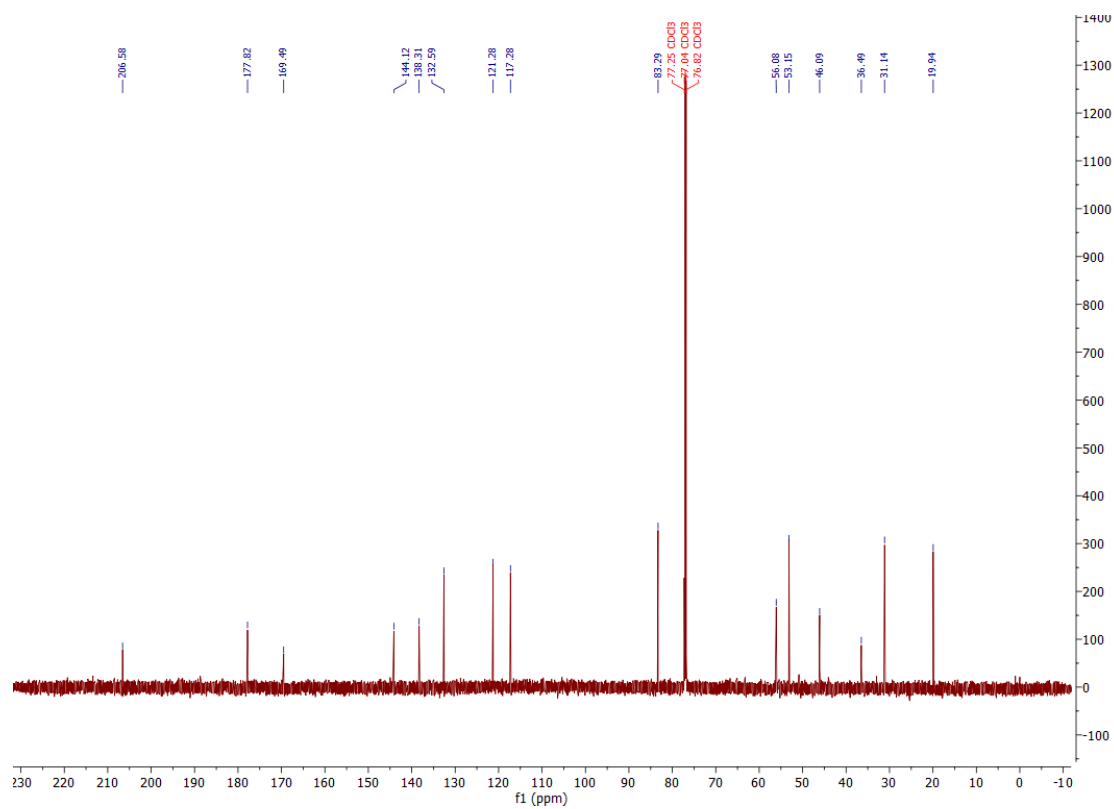

Figure S19.  $^{13}\text{C}$ -NMR spectrum of 2-oxo-8-deoxyligustrin

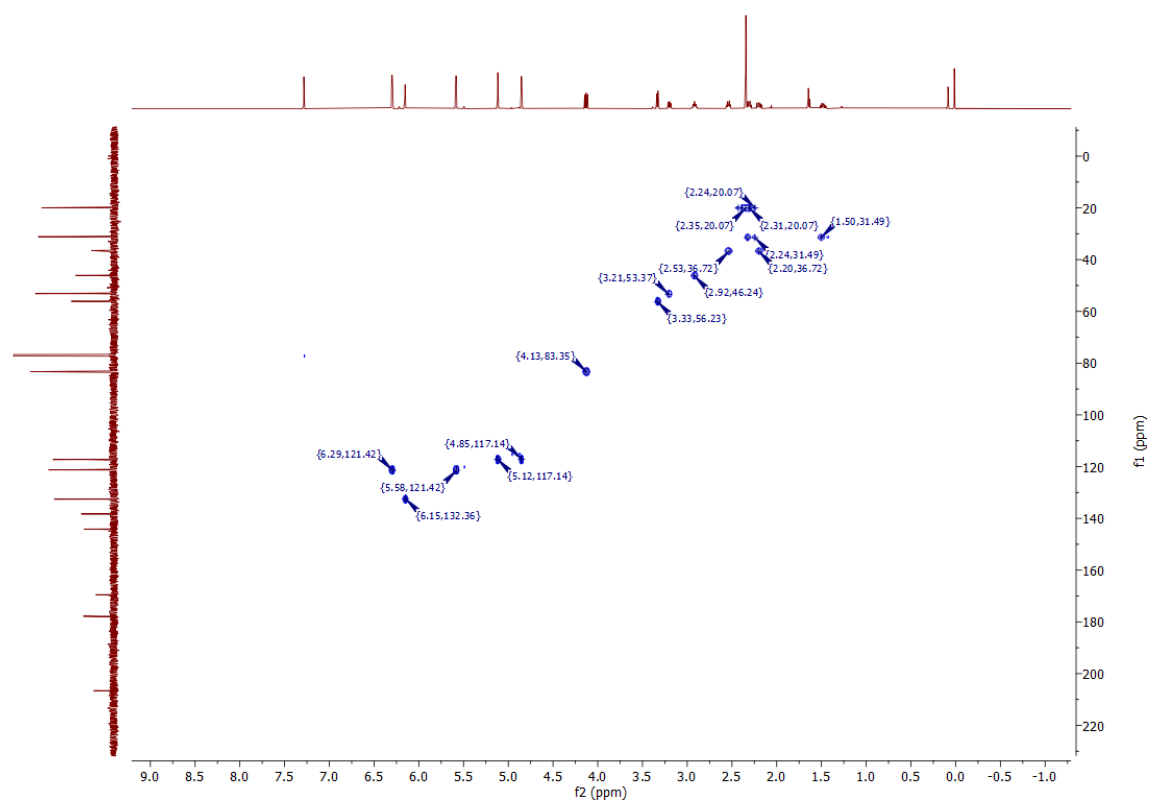

Figure S20. HSQC spectrum of 2-oxo-8-deoxyligustrin

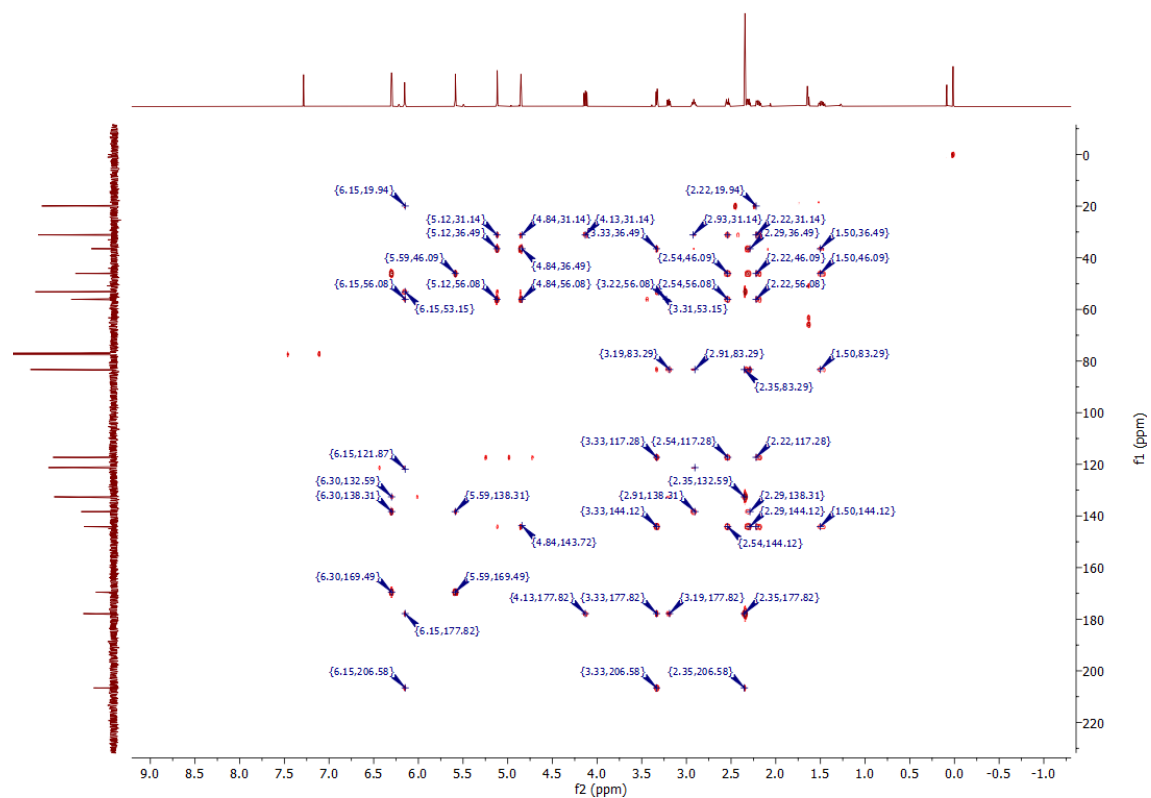

Figure S21. HMBC spectrum of 2-oxo-8-deoxyligustrin

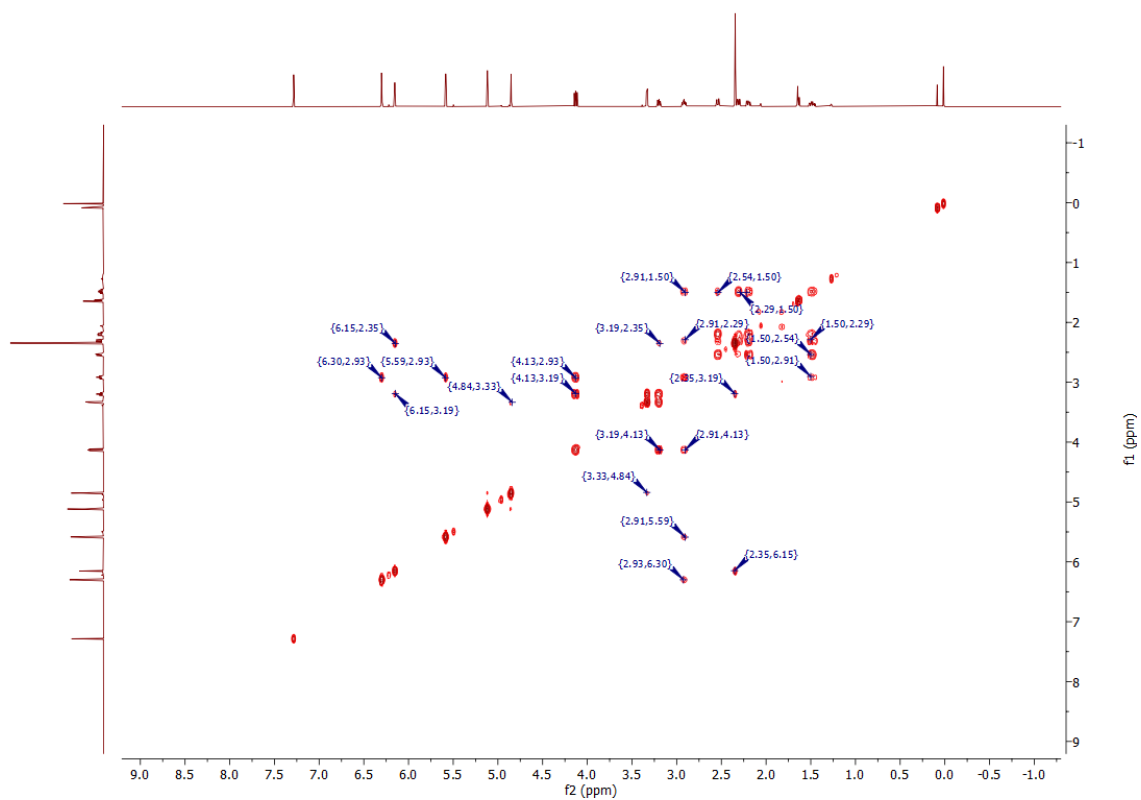

Figure S22.  $^1\text{H}/^1\text{H}$ -COSY spectrum of 2-oxo-8-deoxyligustrin

## 5. Chemical structure and spectral data of eupatorin (compound 13)

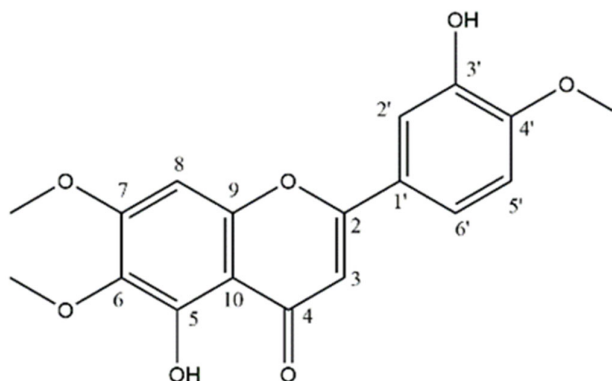

Figure S23. Chemical structure of eupatorin

LC-ESI/MS  $m/z$  (rel. int): 345.1096  $[M+H]^+$  (100.0), 367.0923  $[M+Na]^+$  (31.2), 711.1928  $[2M+Na]^+$  (83.2).

$^1H$  NMR (600 MHz,  $CDCl_3$ )  $\delta$  12.74 (s, 1H, 5-OH), 7.47 (d,  $J = 2.3$  Hz, 1H, H-2'), 7.43 (dd,  $J = 8.5, 2.2$  Hz, H, H-6'), 6.95 (d,  $J = 8.5$  Hz, 1H, H-5'), 6.57 (s, 1H, H-3), 6.54 (s, 1H, H-8), 5.75 (s, 1H, 3'-OH), 3.98 (s, 3H, 4'-OCH<sub>3</sub>), 3.96 (s, 3H, 7-OCH<sub>3</sub>), 3.92 (s, 3H, 6-OCH<sub>3</sub>).

$^{13}C$  NMR (151 MHz,  $CDCl_3$ )  $\delta$  182.84 (C-4), 163.97 (C-2), 158.92 (C-7), 153.39 (C-5), 153.20 (C-9), 149.73, C-4'), 146.19 (C-3'), 132.79 (C-6), 124.67 (C-1'), 119.27 (C-6'), 112.49 (C-2'), 110.85 (C-5'), 106.34 (C-10), 104.68 (C-3), 90.73 (C-8), 61.02 (6-OCH<sub>3</sub>), 56.47 (7-OCH<sub>3</sub>), 56.31 (7-OCH<sub>3</sub>).

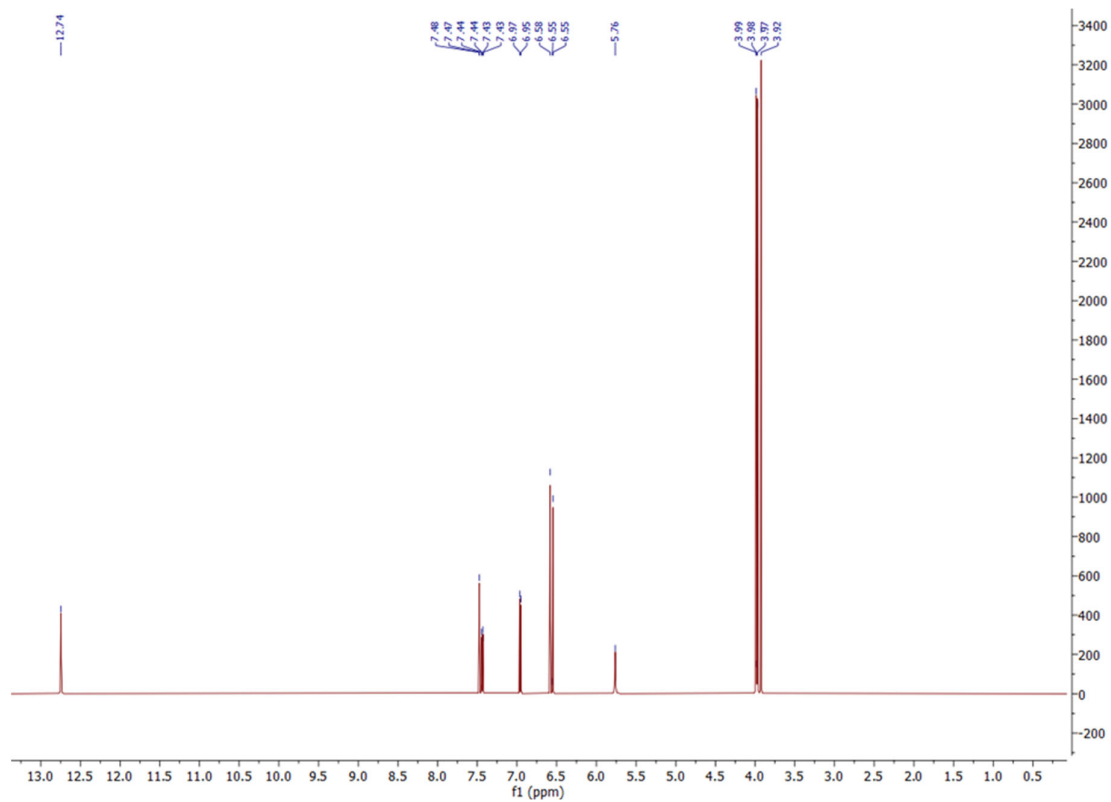

Figure S24.  $^1\text{H}$ -NMR spectrum of eupatorin

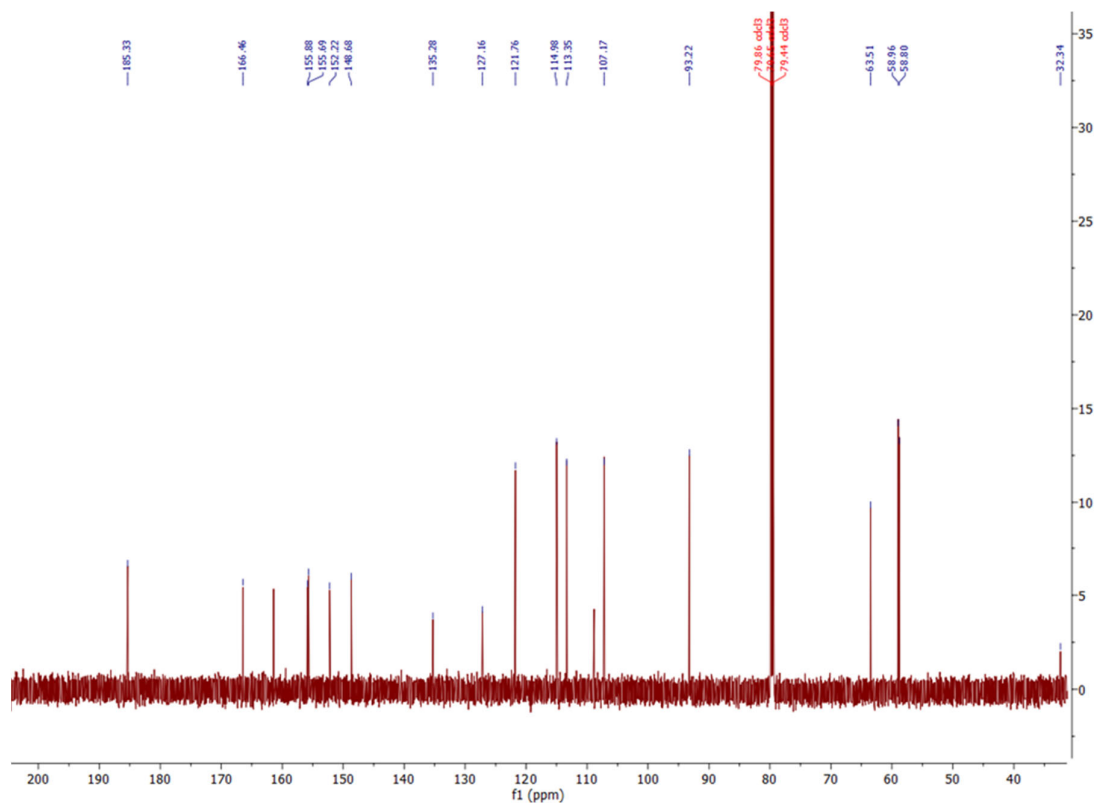

Figure S25.  $^{13}\text{C}$ -NMR spectrum of eupatorin

## 6. Chemical structure and spectral data of 5-demethylsinensetin (compound 14)

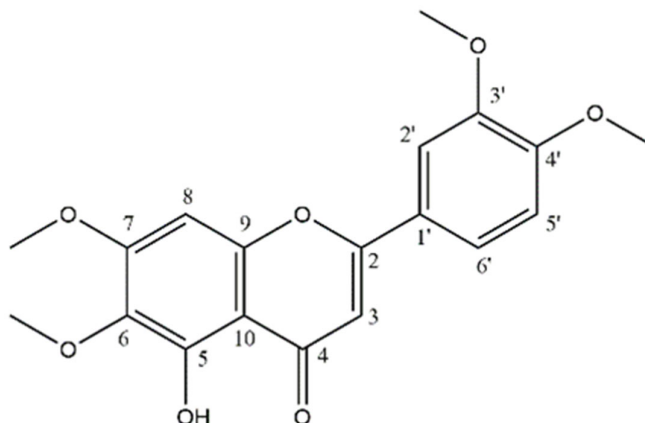

Figure S26. Chemical structure of 5-demethylsinensetin

EI/MS (70 eV)  $m/z$  (rel. int): 359.4  $[M+H]^+$  (28.05) 358.4  $[M]^+$  (97.82), 343.2  $[M-Me]^+$  (60.78), 312.4  $[M-CO-H_2O]^+$  (23.89), 83.2 (44.13), 57.2 (61.40), 55.2 (72.06), 43.2 (100.00), 41.2 (50.14).

$^1H$  NMR (600 MHz,  $CDCl_3$ )  $\delta$  12.78 (s, 1H, 5-OH), 7.56 (dd,  $J$  = 8.5, 2.1 Hz, 1H, H-6'), 7.37 (d,  $J$  = 2.1 Hz, 1H, H-2'), 7.01 (d,  $J$  = 8.5 Hz, 1H, H-5'), 6.63 (s, 1H, H-3), 6.58 (s, 1H, H-8), 4.02 (s, 3H,  $OCH_3$ ), 4.01 (s, 3H,  $OCH_3$ ), 4.00 (s, 3H,  $OCH_3$ ), 3.96 (s, 3H,  $OCH_3$ ).

$^{13}C$  NMR (125 MHz,  $CDCl_3$ )  $\delta$  182.63 (C-4), 163.99 (C-2), 158.75 (C-7), 153.24 (C-9), 153.08 (C-5), 152.30 (C-3'), 149.34 (C-4'), 132.67 (C-6), 123.81 (C-1'), 120.09 (C-6'), 111.18 (C-5'), 108.80 (C-2'), 106.17 (C-10), 104.51 (C-3), 90.60 (C-8), 60.89 (6-OMe), 56.36 (7-OMe), 56.16 (3'-OMe), 56.13 (4'-OMe).

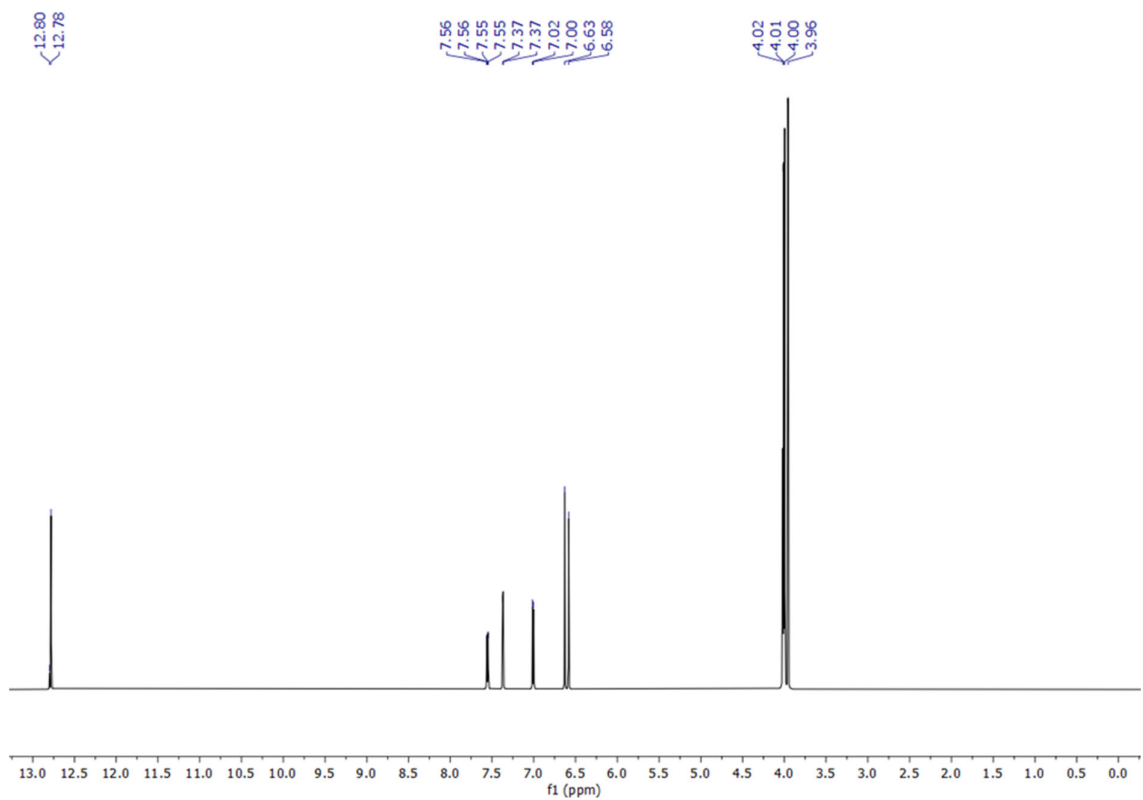

Figure S27. <sup>1</sup>H-NMR spectrum of 5-demethylsinensetin

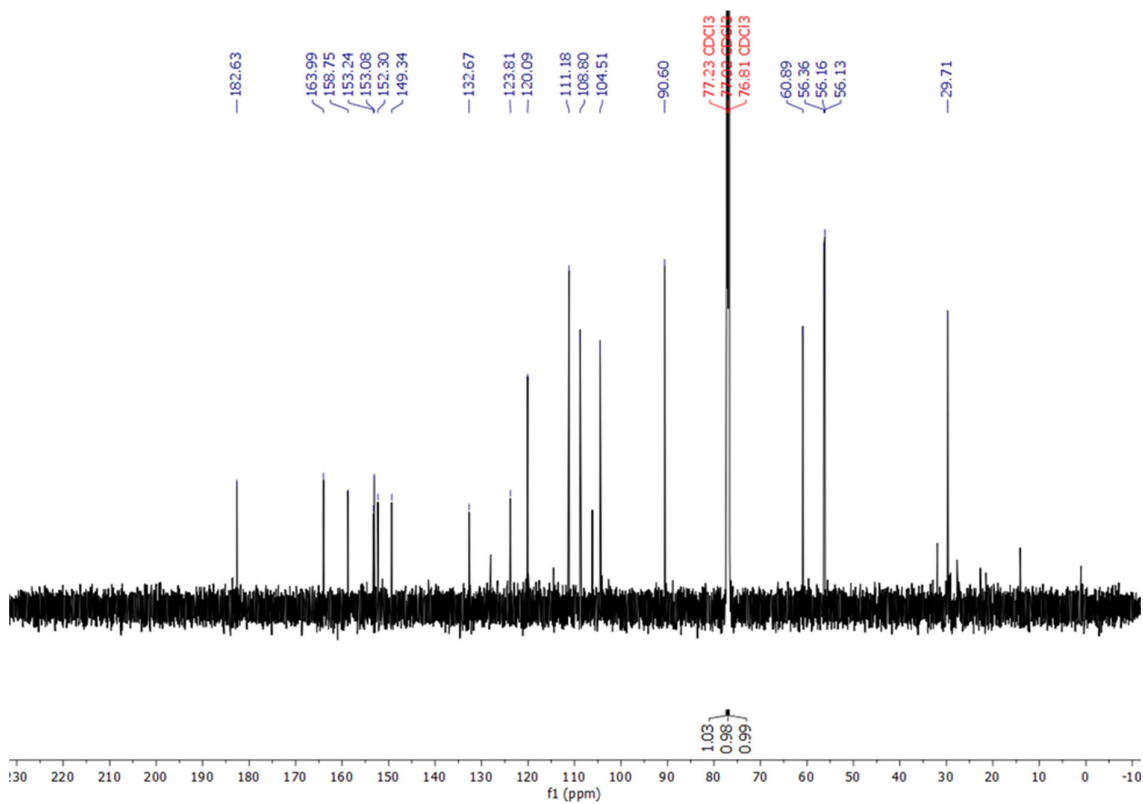

Figure S28. <sup>13</sup>C-NMR spectrum of 5-demethylsinensetin



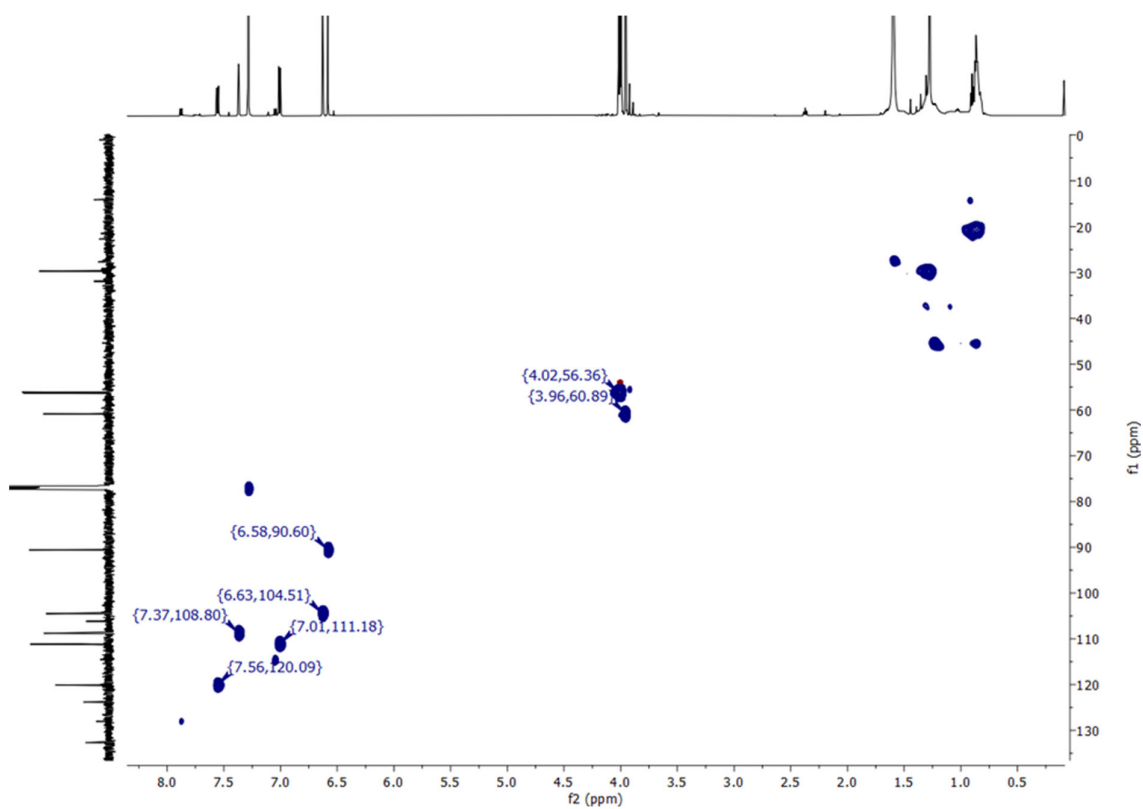

Figure S29. HSQC spectrum of 5-demethylsinensetin

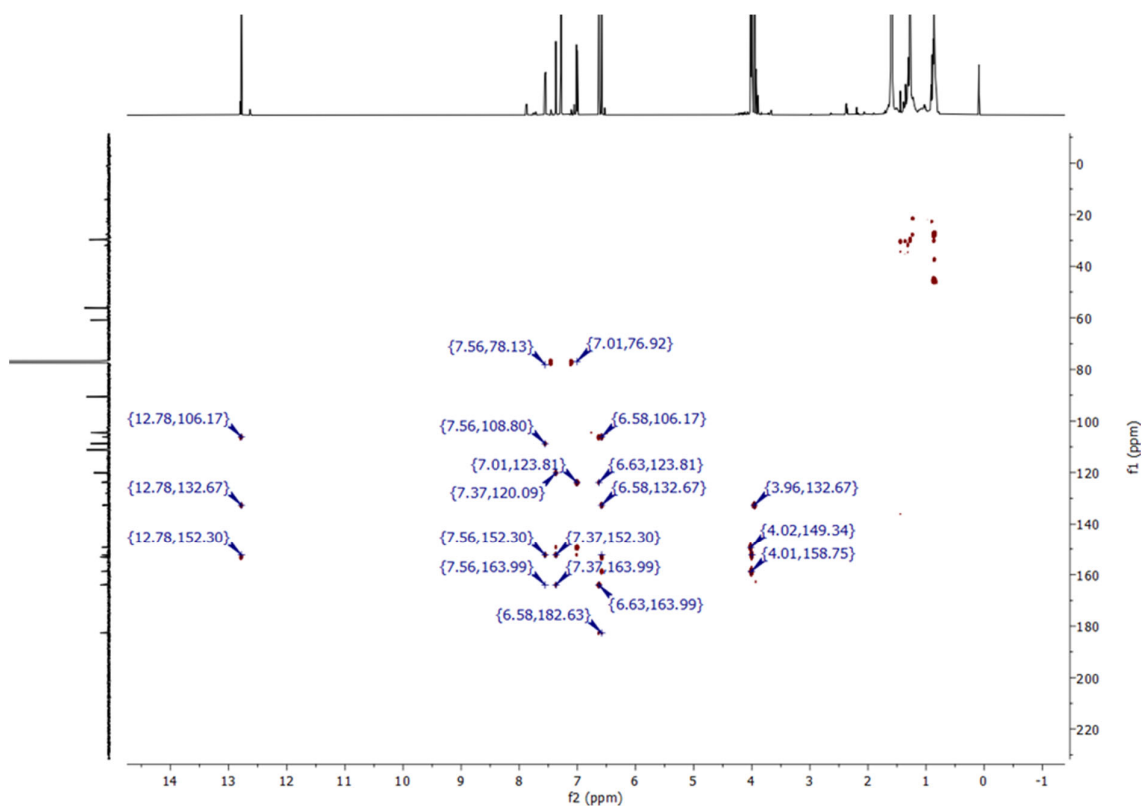

Figure S30. HMBC spectrum of 5-demethylsinensetin

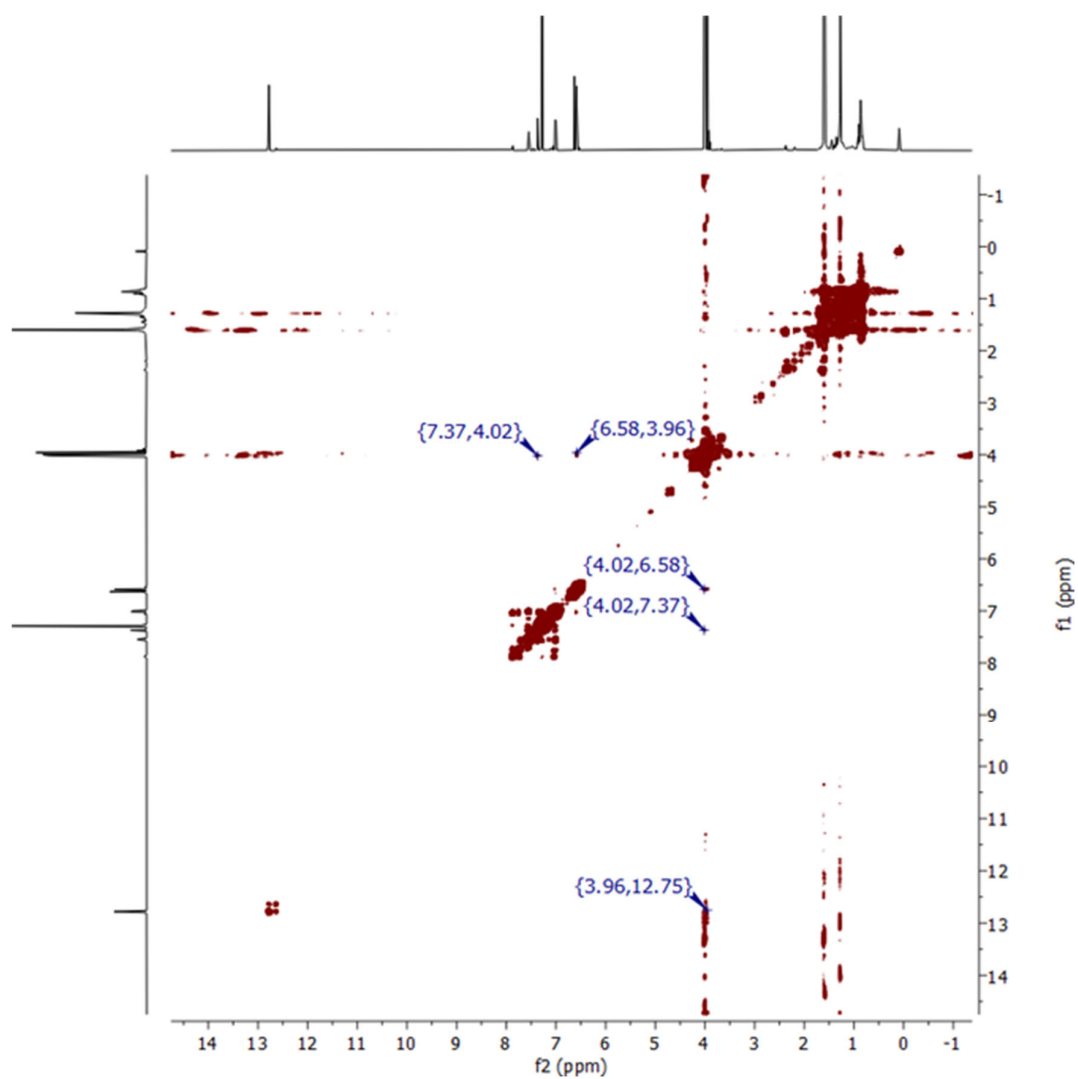

Figure S31.  $^1\text{H}$ - $^1\text{H}$  COSY spectrum of 5-demethylsinensetin

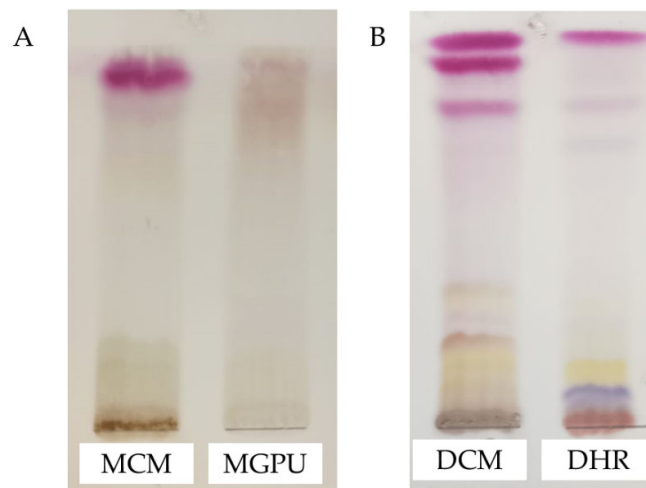

Figure S32. TLC analysis of methanolic and dichloromethane extracts MGPU, MCM, DHR and DCM. (A) MCM and MGPU (Chromatographic system: Stationary phase: Silicagel F<sub>254</sub>, Mobile phase: ETAC:MEOH (10:5), spray reagent: Anisaldehyde-sulphuric acid; (B) DCM and DHR (Chromatographic system: Stationary phase: Silicagel F<sub>254</sub>, Mobile phase: HX:ETAC (1:1), spray reagent: Anisaldehyde-sulphuric acid).
